# Supplementary material
Source: ML conference proceedings conference paper supplement (https://openreview.net/forum?id=snWG3KVTQJ)
Supplement: supplementary_material [file missing_derivation.pdf › supplementary/missing_derivation.pdf]

---

## Missing Derivation from Section C.3

---

**Anonymous Author(s)**

Affiliation

Address

email

- 1 Let  $\tilde{\pi}'$  be as in Section C.3. Choose any  $c \in \mathcal{C}$  and  $v \in \mathcal{V}$ . For all  $t \in [T]$  define  $\xi_t := \tilde{\pi}'(c, (v, t), \circ)$ .  
 2 For all  $t \in [T]$  let  $\mathcal{H}_t := \mathcal{A}^{[t]}$  and for all  $e \in \mathcal{H}_t$  let:

$$\Lambda(e) := \sum_{s \in [t-1]} \llbracket e(s) \neq e(s+1) \rrbracket$$

- 3 We take the inductive hypothesis over  $t \in [T]$  that there exists a distribution  $\varphi_t \in \Delta_{\mathcal{H}_t}$  such that for  
 4 all  $s \in [t]$  and  $a \in \mathcal{A}$  we have:

$$\xi_s(a) = \sum_{e \in \mathcal{H}_t} \llbracket e(s) = a \rrbracket \varphi_t(e)$$

- 5 and we have:

$$\sum_{e \in \mathcal{H}_t} \varphi_t(e) \Lambda(e) = \frac{1}{2} \sum_{s \in [t-1]} \sum_{a \in \mathcal{A}} |\xi_s(a) - \xi_{s+1}(a)|$$

- 6 The inductive hypothesis clearly holds for  $t = 1$  as then both sides of the above equation are equal to  
 7 zero. Now suppose it holds for  $t$ . Let  $\mathcal{S}$  be the set of all  $a \in \mathcal{A}$  with  $\xi_{t+1}(a) \leq \xi_t(a)$ . For all  $a \in \mathcal{S}$   
 8 let  $r(a) := \xi_{t+1}(a)/\xi_t(a)$ . For all  $a \in \mathcal{A} \setminus \mathcal{S}$  let:

$$q(a) := \frac{\xi_{t+1}(a) - \xi_t(a)}{\sum_{a' \in \mathcal{A} \setminus \mathcal{S}} (\xi_{t+1}(a') - \xi_t(a'))}$$

- 9 For all  $e \in \mathcal{H}_t$  and  $a \in \mathcal{A}$  let  $\gamma(e, a)$  be the function  $e' \in \mathcal{H}_{t+1}$  with  $e'(t+1) = a$  and whose  
 10 restriction onto  $[t]$  is equal to  $e$ . For all  $a \in \mathcal{A} \setminus \mathcal{S}$  and  $e \in \mathcal{H}_t$  with  $e(t) = a$  define:

$$\varphi_{t+1}(\gamma(e, a)) := \varphi_t(e)$$

- 11 For all  $a \in \mathcal{S}$ ,  $a' \in \mathcal{A} \setminus \mathcal{S}$  and  $e \in \mathcal{H}_t$  with  $e(t) = a$  define:

$$\varphi_{t+1}(\gamma(e, a)) := r(a) \varphi_t(e)$$

- 12 and define:

$$\varphi_{t+1}(\gamma(e, a')) := q(a')(1 - r(a)) \varphi_t(e)$$

- 13 For all other  $e' \in \mathcal{H}_{t+1}$  we define  $\varphi_{t+1}(e') := 0$ .

- 14 Note that for all  $s \in [t]$  and  $a \in \mathcal{A}$  we have:

$$\xi_s(a) = \sum_{e \in \mathcal{H}_t} \llbracket e(s) = a \rrbracket \varphi_t(e) = \sum_{e \in \mathcal{H}_t} \llbracket e(s) = a \rrbracket \sum_{a' \in \mathcal{A}} \varphi_{t+1}(\gamma(e, a')) = \sum_{e' \in \mathcal{H}_{t+1}} \llbracket e'(s) = a \rrbracket \varphi_{t+1}(e')$$

- 15 and for all  $a \in \mathcal{S}$  we have:

$$\xi_{t+1}(a) = r(a) \xi_t(a) = r(a) \sum_{e \in \mathcal{H}_t} \llbracket e(t) = a \rrbracket \varphi_t(e) = \sum_{e \in \mathcal{H}_t} \llbracket e(t) = a \rrbracket \varphi_{t+1}(\gamma(e, a)) = \sum_{e' \in \mathcal{H}_{t+1}} \llbracket e'(t+1) = a \rrbracket \varphi_{t+1}(e')$$

16 and for all  $a \in \mathcal{A} \setminus \mathcal{S}$  we have:

$$\begin{aligned}
\xi_{t+1}(a) &= \xi_t(a) + (\xi_{t+1}(a) - \xi_t(a)) \\
&= \xi_t(a) + q(a) \sum_{a' \in \mathcal{A} \setminus \mathcal{S}} (\xi_{t+1}(a') - \xi_t(a')) \\
&= \xi_t(a) + q(a) \sum_{a' \in \mathcal{S}} (\xi_t(a') - \xi_{t+1}(a')) \\
&= \xi_t(a) + q(a) \sum_{a' \in \mathcal{S}} (1 - r(a')) \xi_t(a') \\
&= \sum_{e \in \mathcal{H}_t} \mathbb{I}[e(t) = a] \varphi_t(e) + q(a) \sum_{a' \in \mathcal{S}} (1 - r(a')) \sum_{e \in \mathcal{H}_t} \mathbb{I}[e(t) = a'] \varphi_t(e) \\
&= \sum_{e \in \mathcal{H}_t} \mathbb{I}[e(t) = a] \varphi_t(e) + \sum_{a' \in \mathcal{S}} \sum_{e \in \mathcal{H}_t} \mathbb{I}[e(t) = a'] q(a) (1 - r(a')) \varphi_t(e) \\
&= \sum_{e' \in \mathcal{H}_{t+1}} \mathbb{I}[e'(t+1) = a] \varphi_{t+1}(e')
\end{aligned}$$

17 We have now shown that for all  $s \in [t+1]$  and  $a \in \mathcal{A}$  we have:

$$\xi_s(a) = \sum_{e \in \mathcal{H}_{t+1}} \mathbb{I}[e(s) = a] \varphi_{t+1}(e)$$

18 as required.

19 For all  $a \in \mathcal{A} \setminus \mathcal{S}$  and  $e \in \mathcal{H}_t$  with  $e(t) = a$  we have:

$$\sum_{a' \in \mathcal{A}} \varphi_{t+1}(\gamma(e, a')) \Lambda(\gamma(e, a')) = \varphi_{t+1}(\gamma(e, a)) \Lambda(\gamma(e, a)) = \varphi_t(e) \Lambda(e)$$

20 and for all  $a \in \mathcal{S}$  and  $e \in \mathcal{H}_t$  with  $e(t) = a$  we have:

$$\begin{aligned}
\sum_{a' \in \mathcal{A}} \varphi_{t+1}(\gamma(e, a')) \Lambda(\gamma(e, a')) &= \varphi_{t+1}(\gamma(e, a)) \Lambda(\gamma(e, a)) + \sum_{a' \in \mathcal{A} \setminus \mathcal{S}} \varphi_{t+1}(\gamma(e, a')) \Lambda(\gamma(e, a')) \\
&= \varphi_{t+1}(\gamma(e, a)) \Lambda(e) + (\Lambda(e) + 1) \sum_{a' \in \mathcal{A} \setminus \mathcal{S}} \varphi_{t+1}(\gamma(e, a')) \\
&= r(a) \varphi_t(e) \Lambda(e) + (\Lambda(e) + 1) (1 - r(a)) \varphi_t(e) \\
&= \varphi_t(e) \Lambda(e) + (1 - r(a)) \varphi_t(e)
\end{aligned}$$

21 Hence, we have:

$$\begin{aligned}
\sum_{e' \in \mathcal{H}_{t+1}} \varphi_{t+1}(e') \Lambda(e') &= \sum_{e \in \mathcal{H}_t} \varphi_t(e) \Lambda(e) + \sum_{a \in \mathcal{S}} (1 - r(a)) \sum_{e \in \mathcal{H}_t} \mathbb{I}[e(t) = a] \varphi_t(e) \\
&= \sum_{e \in \mathcal{H}_t} \varphi_t(e) \Lambda(e) + \sum_{a \in \mathcal{S}} (1 - r(a)) \xi_t(a) \\
&= \sum_{e \in \mathcal{H}_t} \varphi_t(e) \Lambda(e) + \sum_{a \in \mathcal{S}} (\xi_t(a) - \xi_{t+1}(a)) \\
&= \frac{1}{2} \sum_{s \in [t-1]} \sum_{a \in \mathcal{A}} |\xi_s(a) - \xi_{s+1}(a)| + \frac{1}{2} \sum_{a \in \mathcal{A}} |\xi_t(a) - \xi_{t+1}(a)| \\
&= \frac{1}{2} \sum_{s \in [t]} \sum_{a \in \mathcal{A}} |\xi_s(a) - \xi_{s+1}(a)|
\end{aligned}$$

22 as required.

23 So the inductive hypothesis holds for all  $t \in [T]$ . In particular it holds for  $t = T$  which completes the  
24 derivation.
